# Supplementary material for: Development of a Positive Psychology Well-Being Intervention in a Community Pharmacy Setting
Source: Preprints.org preprint supplement (doi:10.20944/preprints202211.0415.v1), 2022-11-22
Supplement: Supplementary file 1 [file supplementary]

**Supplementary Material 1**

**Literature Search**

The aim of the literature review was to investigate the effectiveness of PPIs in community-based samples. Three specific research objectives were:

1. To investigate the short-term effects (post-intervention, 1-week, 2-weeks, and 1-month) of PPIs delivered in community-based samples for enhancing well-being,

2. To investigate the sustainability of effect of PPIs (3-, 6-months) delivered in community-based samples for enhancing well-being,

3. To investigate the potential factors, such as recruitment strategies, retention, participants and characteristics of interventions that support the effectiveness of PPIs.

*Methods*

At the first phase, literature selection was based on title, abstract and keywords and then selection was based on the full text. The PICO (Participant Intervention, Comparison, Outcomes) [39] framework was applied to investigate studies that met the inclusion criteria.

Inclusion criteria

The inclusion criteria were as follows:

- Participant: Participants recruited in Western Society populations and from community-based settings only.
- Intervention: Inclusion of at least one of the following Positive Psychology Interventions (or a theoretical model) (search order):
  - *PERMA* (Positive Emotions, Engagement, Relationships, Meaning, Accomplishment)
  - *Best Possible Selves*
  - *Three Good Things*
  - *Using Your Signature Strengths in a New Way*
  - *Identifying Your Signature Strengths*
- Comparison: At least one comparison group i.e., *Early Memories* or alternative control group activity
- Outcomes: Well-being is measured from pre-intervention to post-intervention. Any measure which includes items to assess mood, psychological well-being and/or subjective well-being [21, 27].

Study Design

No strict inclusion criteria were applied for the type of study design.

Exclusion criteria

Studies were excluded if:

- Participants were recruited from the following settings:
  - Education, Workplace, Military and Healthcare.
- The following activities formed part of the intervention which fall outside the definition of PPIs:
  - Physical activity, Mindfulness, Meditation, Forgiveness and Life therapy
- The following reviews of the literature were excluded if they were:
  - Literature reviews, Critical reviews, Scoping review, Systematic reviews and Meta-analyses

*Search Engines and Keywords*

Searches were carried out in PsychInfo, PubMed and Scopus covering the period from 2011 to March 2018 [Step 1], then repeated to October 2019 [Step 2]. The PERMA well-being model [21] was published in 2011, therefore, the review was conducted from 2011 for the most recent PPIs.

The following keywords were used to explore *PERMA-based* interventions: “PERMA” in combination with “positive psychology intervention” or “PPI”.

For the *Best Possible Selves* Intervention, text words used: “BPS” or “Best possible selves” or “best possible self” in combination with “PPI” and “positive psychology intervention”.

For *Three Good Things* intervention text words were limited to: “three good things” or “TGT” in combination with “PPI” and “Positive Psychology Intervention”.

For *Character Strengths*-based interventions, text words were limited to: “character strengths” or “character strengths and virtue” or “character strengths and virtues” or “character strengths in a new way” or “utilising your signature strengths in a new way” in combination with “PPI” and “Positive Psychology Intervention”.

“Community” and “Public” were the text words used to explore the target population.

The search was restricted to research articles and peer-reviewed studies in the English language.

Titles and abstracts were assessed for relevance and duplicates were removed.

Community was only added to specific searches due to the null result of studies when this keyword was added to the initial search.

Studies which did not include “community” were manually searched focusing on how participants were recruited.

*Study Description*

Studies were scanned following the PICOS [39] framework to record participant characteristics (number of participants in the study, average age, gender), intervention (type, sessions, duration, type of delivery), comparison group, outcomes (well-being measurement and timeframe) and study design (research design, quality of study, attrition rate at post-intervention).

*Statistical Analysis*

The p value was set at the class 0.05 threshold, with p<0.05 indicating a statistical significance and p>0.05 resulting in no statistical significance difference [41, 42]. Studies were investigated to understand the effectiveness of PPIs by focusing on whether the intervention had a statistically significant effect on well-being at post-intervention, 1-week, 2-weeks, and 1-month follow up. Additionally, studies were investigated to understand whether PPIs had a statistically significant sustainable effect on well-being 3-, and/or 6-months. Finally, the standardised mean effect sizes were calculated utilising the Wilson Practical Meta-Analysis Effect Size Calculator to understand the magnitude of intervention effectiveness across different timepoints (i.e., post-intervention, 1-week, 2-weeks, 1-, 3- and/or 6-months) on well-being. Effect sizes were assessed as small (0.2), medium (0.5) and large (0.8) [41, 42]. Recruitment strategies, retention, participant, and intervention characteristics were explored to understand their potential influence on the effectiveness of PPIs.

**Supplementary Material 3**

**Table 1. Description of Positive Psychology Interventions in Community-Based Samples (n=9 studies)**

| **Author,**  **Year,**  **Country(ies)** | **Research Design** | **Intervention(s) Type** | **Intervention Sessions, Duration, Type of Delivery** | **Comparison (Control) Group Type** | **Well-being Measure** | **(N=)** | **Attrition Rate % (Post-Intervention)** | **Average Age** | **Female (%)** | **Quality of Methodology** |
| --- | --- | --- | --- | --- | --- | --- | --- | --- | --- | --- |
| [45] Gander, Proyer and Ruch  (2016),  Germany / Switzerland | RCT | *PERMA* | 7, 1-week,  Self-administered  online | Early Memories | AHI | 1624 | 55% | Middle Age | 79.2% | 6 |
| [62] Proyer et al (2015),  Switzerland | RCT | *Signature Strengths,*  *Lesser Strengths* | 7, 1-week,  Self-administered online | Early Memories | AHI | 720 | 52% | Middle Age | 83.7% | 5 |
| [46] Gander, Proyer and Ruch  (2017),  Switzerland / Germany | RCT | *PERMA* | 7,1-week,  Self-administered online | Placebo Control Exercise | SWLS | 112 | 60% | Young Age | 62.7% | 5 |
| [61] Mongrain and Anselmo-Mattews (2012),  United Kingdom | RCT | *Three Good Things, Signature Strengths* | 7, 1-week, Self-administered  online | Early Memories | SHI | 1447 | 24% | Young Age | 83% | 4 |
| [62] Proyer et al (2014),  Switzerland | RCT | *Signature Strengths, Gratitude Visit*, *Three Good Things,* | 7, 1-week,  Self-administered online | Early Memories | AHI | 510 | 32% | Middle Age | 100% | 4 |
| [53] Odou-Vella and Brodrick  (2013),  Australia | RCT | *Three Good Things, Best Possible Selves* | 7,1-week,  Self-administered online | No Activity Control Group | PANAS  WEBWBS | 210 | 18% | Young Age | 78% | 3 |
| [54] Seear and Vella-Brodrick  (2013),  Australia | RCT | *Three Good Things,*  *Best Possible Selves* | 7, 1-week,  Self-administered online | No Activity Control Group | WEBWBS  PANAS | 211 | 16% | Young Age | 75.3% | 3 |
| [47] Greenawalt et al  (2018),  USA | Cross-Sectional Longitudinal Study | *PERMA* | 8, 8-weeks, Face to Face, Group-administered | No Activity Control Group | SWLS  SHS | 52 | 0% | Older Age | 88.5% | 2 |
| [60] Woodworth et al  (2016),  Australia | N-1 Counterbalanced Design | *Three Good Things, Signature Strengths, Gratitude Visit* | 1, 9-10weeks,  Self-administered online | No Activity Control Group | PANAS | 15 | 0% | Middle Age | 73.3% | 2 |

**Key.**

Positive and Negative Affect Schedule= PANAS; Warwick-Edinburgh Mental Well-Being= WEBWBS; Authentic Happiness Index= AHI; Epidemiologic Studies Depression Scale= CES-D; Satisfaction with Life Scale= SWLS; Orientations to Happiness Questionnaire= OTH; Relationship Scale= REL; Accomplishment Scale= ACC; Subjective Happiness Scale= SHS; Depression Scale= PHQ-9; SHI= Steen Happiness Index

**Methodological Quality**

Three studies were rated as high quality [45, 46, 62], four as medium quality [53, 54, 61, 63] and two as low quality [47, 60]. Table 2 shows the breakdown of scores for each criterion for the assessment of quality of the methodology of the nine studies.

**Table 2. Assessment of Methodological Quality ofStudies (n=9 studies)**

| **Authors (Year) / Criterion** | **1** | **2** | **3** | **4** | **5** | **6** | **Total** |
| --- | --- | --- | --- | --- | --- | --- | --- |
| [45] Gander, Proyer and Ruch (2016) | 1 | 1 | 1 | 1 | 1 | 1 | 6 |
| [62] Proyer et al (2015) | 1 | 1 | 1 | 1 | 1 | 0 | 5 |
| [46] Gander, Proyer and Ruch (2017) | 1 | 1 | 1 | 1 | 1 | 0 | 5 |
| [61] Mongrain and Anselmo-Mattews (2012) | 1 | - | 1 | 1 | 1 | 0 | 4 |
| [63] Proyer et al (2014) | 1 | - | 1 | 1 | 0 | 0 | 4 |
| [53] Odou and Vella-Brodrick (2013) | 1 | - | 1 | 1 | 0 | 0 | 3 |
| [54] Seear and Vella-Brodrick (2013) | 1 | 0 | 1 | 1 | 0 | 0 | 3 |
| [47] Greenwalt et al (2018) | 0 | 0 | 1 | 1 | 0 | 0 | 2 |
| [60] Woodworth et al (2016) | 0 | 0 | 1 | 1 | 0 | 0 | 2 |

**Key:**

Index; 1= yes; 0= no; - = missing data

Criterion: 1= Adequacy of randomization concealment, 2= Blinding of subjects to the condition (blinding of assessors was not applicable in most cases), 3= Baseline comparability, 4= Power analysis: is there an adequate power analysis and/or are there at least 50 participants in the analysis? 5=Completeness of follow up data: clear attrition analysis and loss to follow up < 50%, 6= Handling of missing data: the use of intention-to-treat analysis.

Rating: High= 5-6; Medium= 3-4; Low= 0-2

**Table 3. Effectiveness of Positive Psychology Interventions in Community-Based Samples on Well-being over Time (n=9 studies)**

| **Author (Year)** | **Quality of**  **Methodologies** | **Intervention Sessions, Duration, Type** | **Well-being Measurement** | **Effectiveness on Well-being over Time** | | | | |
| --- | --- | --- | --- | --- | --- | --- | --- | --- |
|  |  |  |  | **Post** | **2W** | **1M** | **3M** | **6M** |
| [45] Gander, Proyer and Ruch (2016) | High | 7,1-week, PERMA | AHI | * | - | * | * | * |
| [62] Proyer et al (2015) | High | 7,1-week, *Signature Strengths* | AHI | * | * | * | * | NS |
| [46] Gander, Proyer and Ruch (2017) | High | 7,1-week, *PERMA* | SWLS | * | NS | NS | - | - |
| [46] Gander, Proyer and Ruch (2017) | Medium | 7,1-week, *PERMA* | PANAS (PA),  PANAS (NA) | * | NS | NS | - | - |
| [61] Mongrain and Anselmo-Mattews (2012) | Medium | 7,1-week, *Three Good Things* | SHI | * | * | * | * | * |
| [61] Mongrain and Anselmo-Mattews (2012) | Medium | 7,1-week, *Signature Strengths* | SHI | * | * | * | * | * |
| [63] Proyer et al (2014) | Medium | 7,1-week, *Signature Strengths* | AHI | * | - | * | * | * |
| [63] Proyer et al (2014) | Medium | 7,1-week, *Three Good Things* | AHI | * | - | NS | NS | NS |
| [63] Proyer et al (2014) | Medium | 7,1-week, *Gratitude Visit* | AHI | * | - | * | NS | NS |
| [53] Odou and Vella-Brodrick (2013) | Medium | 7,1-week, *Best Possible Selves* | PANAS (PA),  PANAS (NA) | NS,  * | NS,  NS | - | - | - |
| [53] Odou and Vella-Brodrick (2013) | Medium | 7,1-week, *Best Possible Selves* | WEMWBS | NS | NS | - | - | - |
| [53] Odou and Vella-Brodrick (2013) | Medium | 7,1-week, *Three Good Things* | WEMWBS | NS | NS | - | - | - |
| [53] Odou and Vella-Brodrick (2013) | Medium | 7,1-week, *Three Good Things* | PANAS (PA),  PANAS (NA), | NS | NS | - | - | - |
| [54] Seear and Vella-Brodrick (2013) | Medium | 7,1-week, *Three Good Things* | WEMWBS | NS | NS | - |  |  |
| [54] Seear and Vella-Brodrick (2013) | Medium | 7,1-week, *Three Good Things* | PANAS (PA),  PANAS (NA), | NS,  * | NS,  NS | - | - | - |
| [54] Seear and Vella-Brodrick (2013) | Medium | 7,1-week, *Best Possible Selves* | WEMWBS | NS, | NS, | - | - | - |
| [54] Seear and Vella-Brodrick (2013) | Medium | 7,1-week, *Best Possible Selves* | PANAS (PA),  PANAS (NA), | NS,  * | NS,  NS | - | - | - |
| [47] Greenwalt et al (2018) | Low | 8, 8-weeks, *PERMA* | SWLS, SHS | * | - | - | - | - |
| [60] Woodworth et al (2016) | Low | 1, 9-10weeks, *Three Good Things,*  *Gratitude Visit* | PANAS (PA),  PANAS (NA), | NS,  NS | - | - | - | - |
| [60] Woodworth et al (2016) | Low | 1, 9-10weeks, *Signature Strengths* | PANAS (PA),  PANAS (NA), | *,  NS | - | - | - | - |

**Key:**

Negative Affect Schedule= PANAS; Positive and Negative Affect Schedule, Positive Affect= PANAS (PA), Positive and Negative Affect Schedule, Negative Affect= PANAS (NA); Warwick-Edinburgh Mental Well-Being= WEBWBS; Authentic Happiness Index= AHI; Epidemiologic Studies Depression Scale= CES-D; Satisfaction with Life Scale= SWLS; Orientations to Happiness Questionnaire= OTH; Relationship Scale= REL; Accomplishment Scale= ACC; Subjective Happiness Scale= SHS; Depression Scale= PHQ-9; SHI= Steen Happiness Index ; * = Statistically Significant, NS= Not Statistically Significant p<0.05, - = Well-being measurement not taken at timepoint.

**Table 4. Mean Effect Size (Cohen’s d) for Positive Psychology Interventions compared to Control Groups over Time (n=9 studies)**

| **Author (Year)** | **Intervention Sessions, Duration, Type** | **Well-being Measurement** | **Mean Effect Size over time on well-being** | | | | |
| --- | --- | --- | --- | --- | --- | --- | --- |
|  |  |  | **Post** | **2W** | **1M** | **3M** | **6M** |
| [45] Gander, Proyer and Ruch (2016) | 7, 1-week, PERMA | AHI | 0.2 | - | 0.1 | 0.2 | 0.1 |
| [62] Proyer et al (2015) | 7, 1-week, *Signature Strengths* | AHI | 0.0 | - | 0.1 | 0.0 | 0.1 |
| [46] Gander, Proyer and Ruch (2017) | 7, 1-week, *PERMA* | SWLS | 0.032 | 0.2 | 0.4 | - | - |
| [46] Gander, Proyer and Ruch (2017) | 7, 1-week, *PERMA* | PANAS (PA),  PANAS (NA) | 0.1  -0.2 | 0.1  -0.1 | 0.1  -0.3 | - | - |
| [61] Mongrain and Anselmo-Mattews (2012) | 7, 1-week, *Three Good Things* | SHI | 0.0 | - | 0.1 | 0.0 | 0.2 |
| [561] Mongrain and Anselmo-Mattews (2012) | 7, 1-week, *Signature Strengths* | SHI | 0.1 | - | 0.1 | 0.1 | 0.3 |
| [63] Proyer et al (2014) | 7, 1-week, *Signature Strengths* | AHI | 0.4 | - | 0.7 | 0.0 | 0.1 |
| [63] Proyer et al (2014) | 7, 1-week, *Three Good Things* | AHI | 0.4 | - | 0.3 | 0.1 | 0.1 |
| [63] Proyer et al (2014) | 7, 1-week, *Gratitude Visit* | AHI | 0.1 | - | 0.1 | 0.1 | 0.1 |
| [53] Odou and Vella-Brodrick (2013) | 7, 1-week, *Best Possible Selves* | PANAS (PA)  PANAS (NA) | 2.2  -3.01 | 3.0,  -1.0 | - | - | - |
| [53] Odou and Vella-Brodrick (2013) | 7, 1-week, *Best Possible Selves* | WEMWBS | 0.6 | 0.8 | - | - | - |
| [53] Odou and Vella-Brodrick (2013) | 7,1-week, *Three Good Things* | WEMWBS | 0.4 | 0.6 | - | - | - |
| [53] Odou and Vella-Brodrick (2013) | 7,1-week, *Three Good Things* | PANAS (PA)  PANAS (NA), | 2.2  -3.2 | 2.3,  -2.5 | - | - | - |
| [54] Seear and Vella-Brodrick (2013) | 7,1-week, *Three Good Things* | WEMWBS | 0.6 | 0.4 | - |  |  |
| [54] Seear and Vella-Brodrick (2013) | 7,1-week, *Three Good Things* | PANAS (PA)  PANAS (NA) | 0.4,  -0.7 | 0.6,  -1.0 | - | - | - |
| [54] Seear and Vella-Brodrick (2013) | 7,1-week, *Best Possible Selves* | WEMWBS | 0.5 | 0.7 | - | - | - |
| [54] Seear and Vella-Brodrick (2013) | 7,1-week, Best Possible Selves | PANAS (PA)  PANAS (NA) | 0.3  -0.6 | 0.6,  -0.4 | - | - | - |
| [47] Greenwalt et al (2018) | 8, 8-weeks, PERMA | SWLS,  SHS | 0.1,  0.9 | - | - | - | - |

**Key:** Positive and Negative Affect Schedule= PANAS; Positive and Negative Affect Schedule, Positive Affect= PANAS (PA), Positive and Negative Affect Schedule, Negative Affect=PANAS (NA);Warwick-Edinburgh Mental Well-Being= WEBWBS; Authentic Happiness Index= AHI; Epidemiologic Studies Depression Scale= CES-D; Satisfaction with Life Scale= SWLS; Orientations to Happiness Questionnaire= OTH; Relationship Scale= REL; Accomplishment Scale= ACC; Subjective Happiness Scale= SHS; Depression Scale= PHQ-9; SHI= Steen Happiness Index; - = Well-being measurement not taken at timepoint.

**Supplementary Material 4**

Version 3 of The *Prescribing Happiness*, Session 1


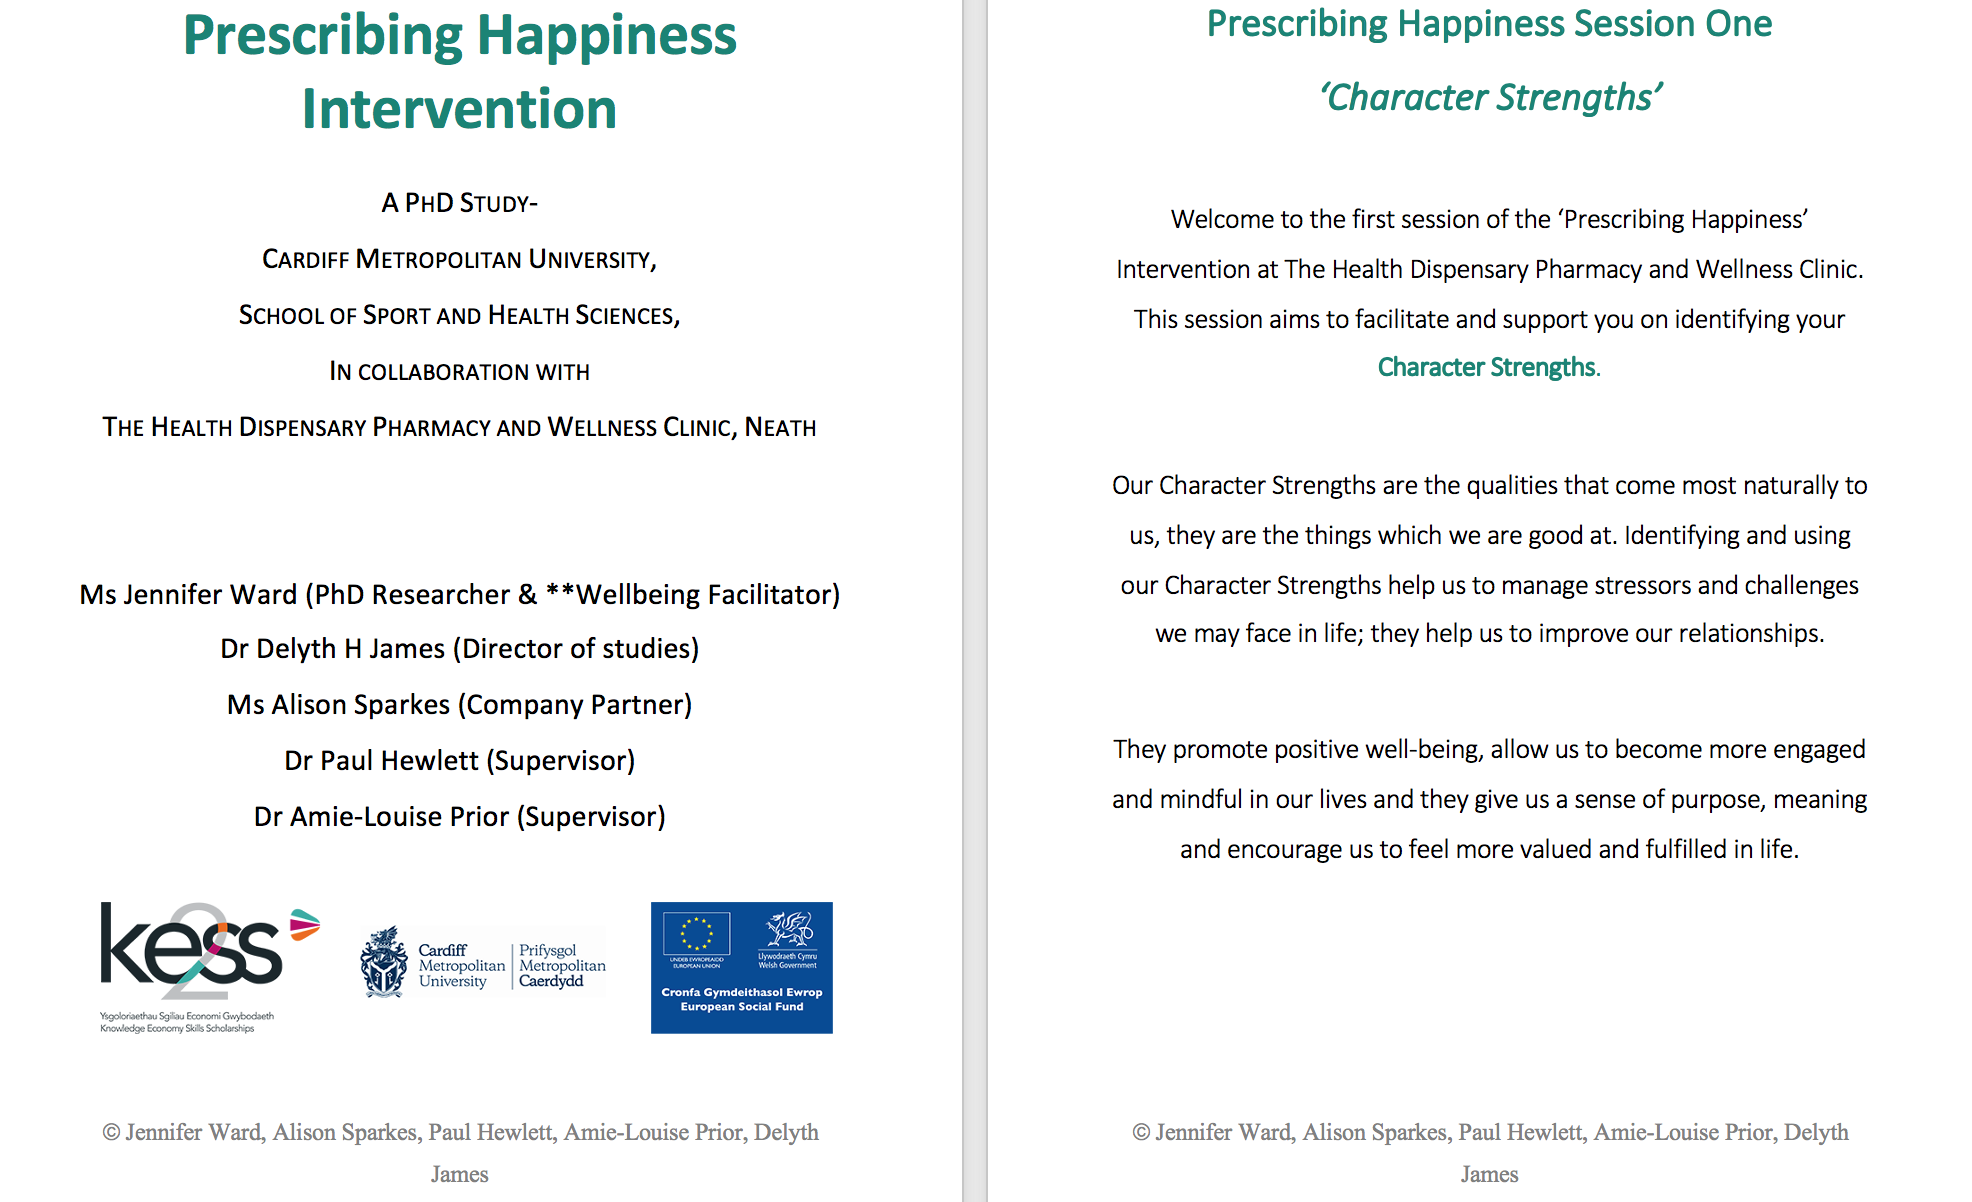


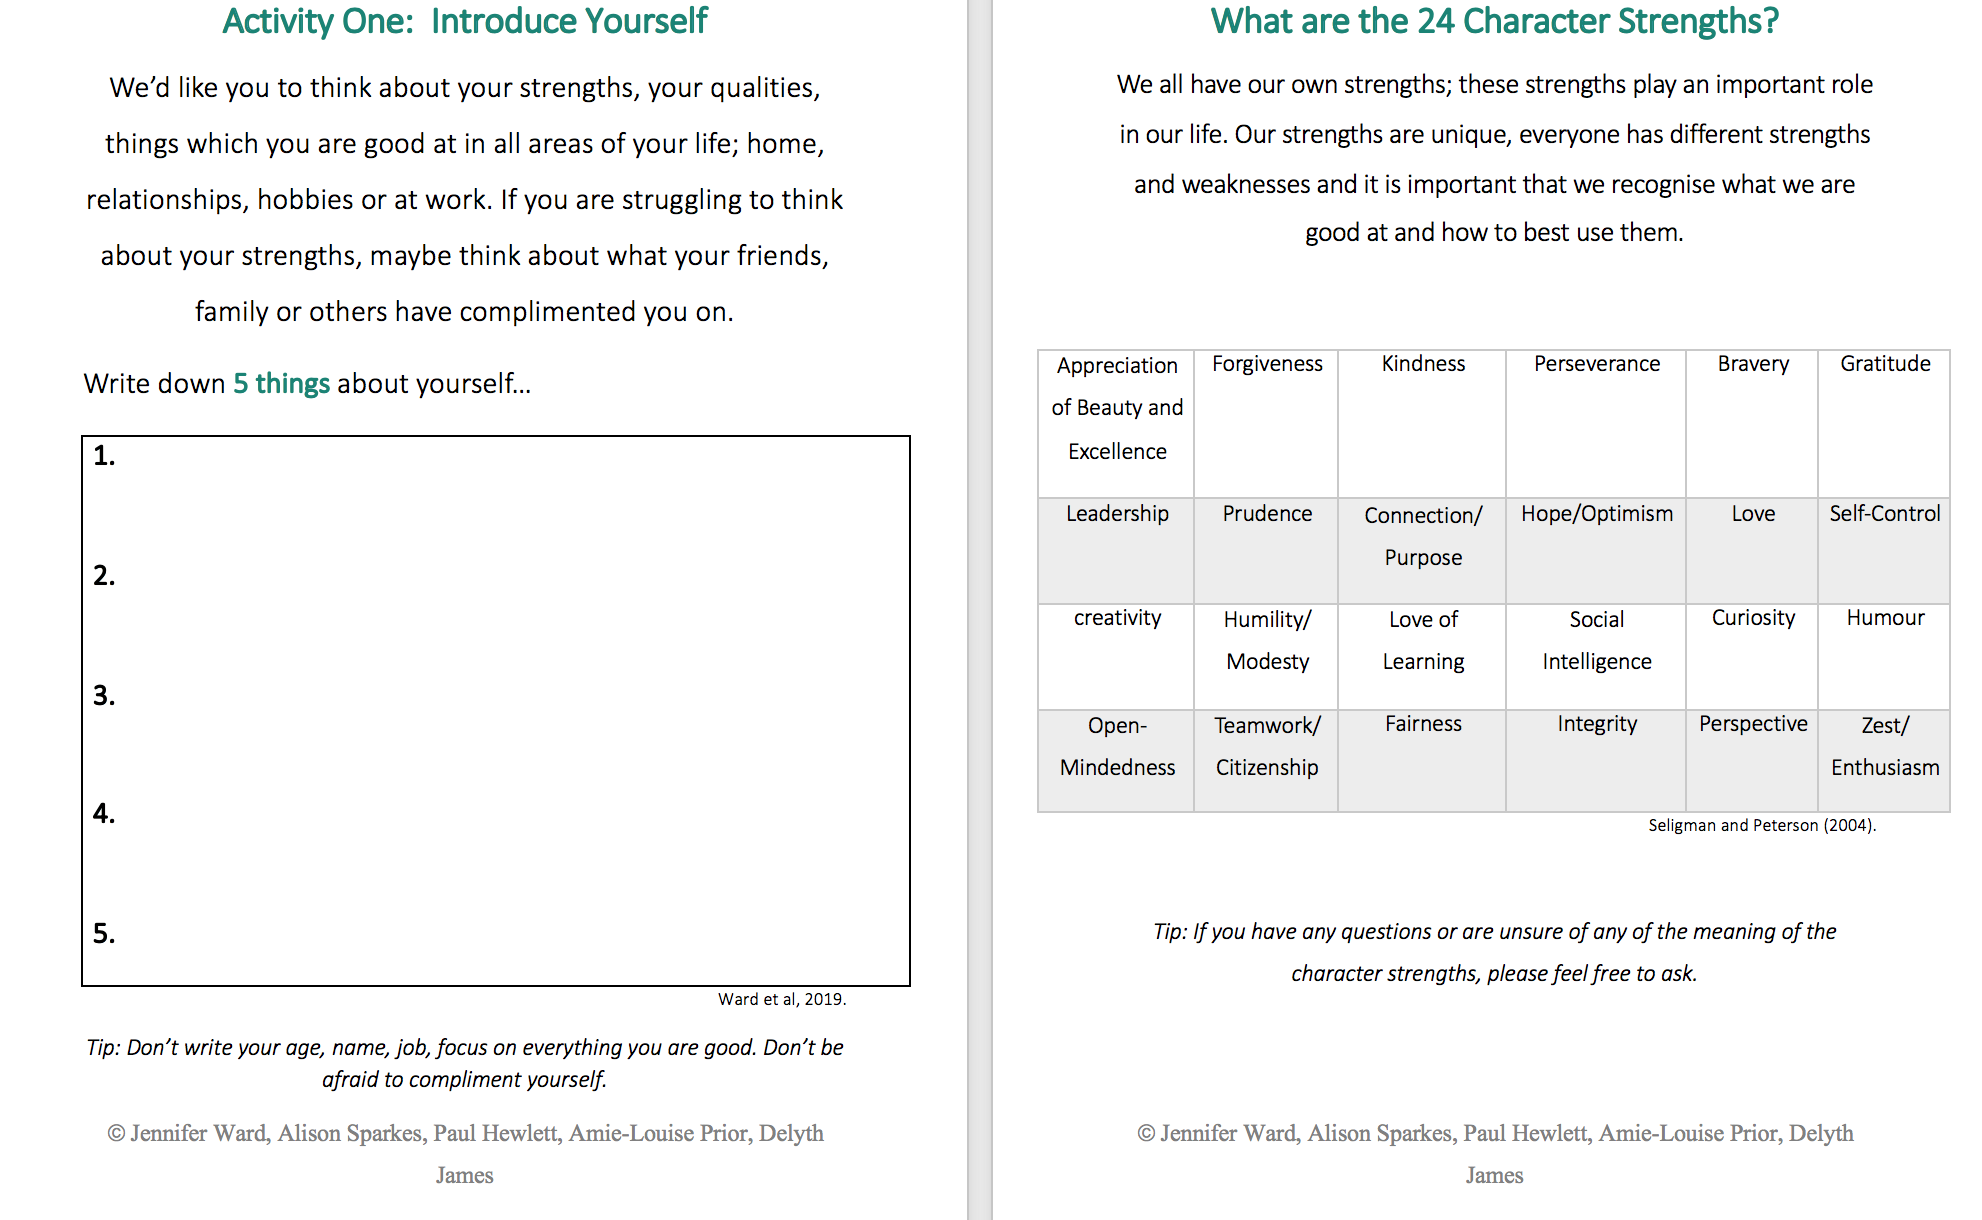


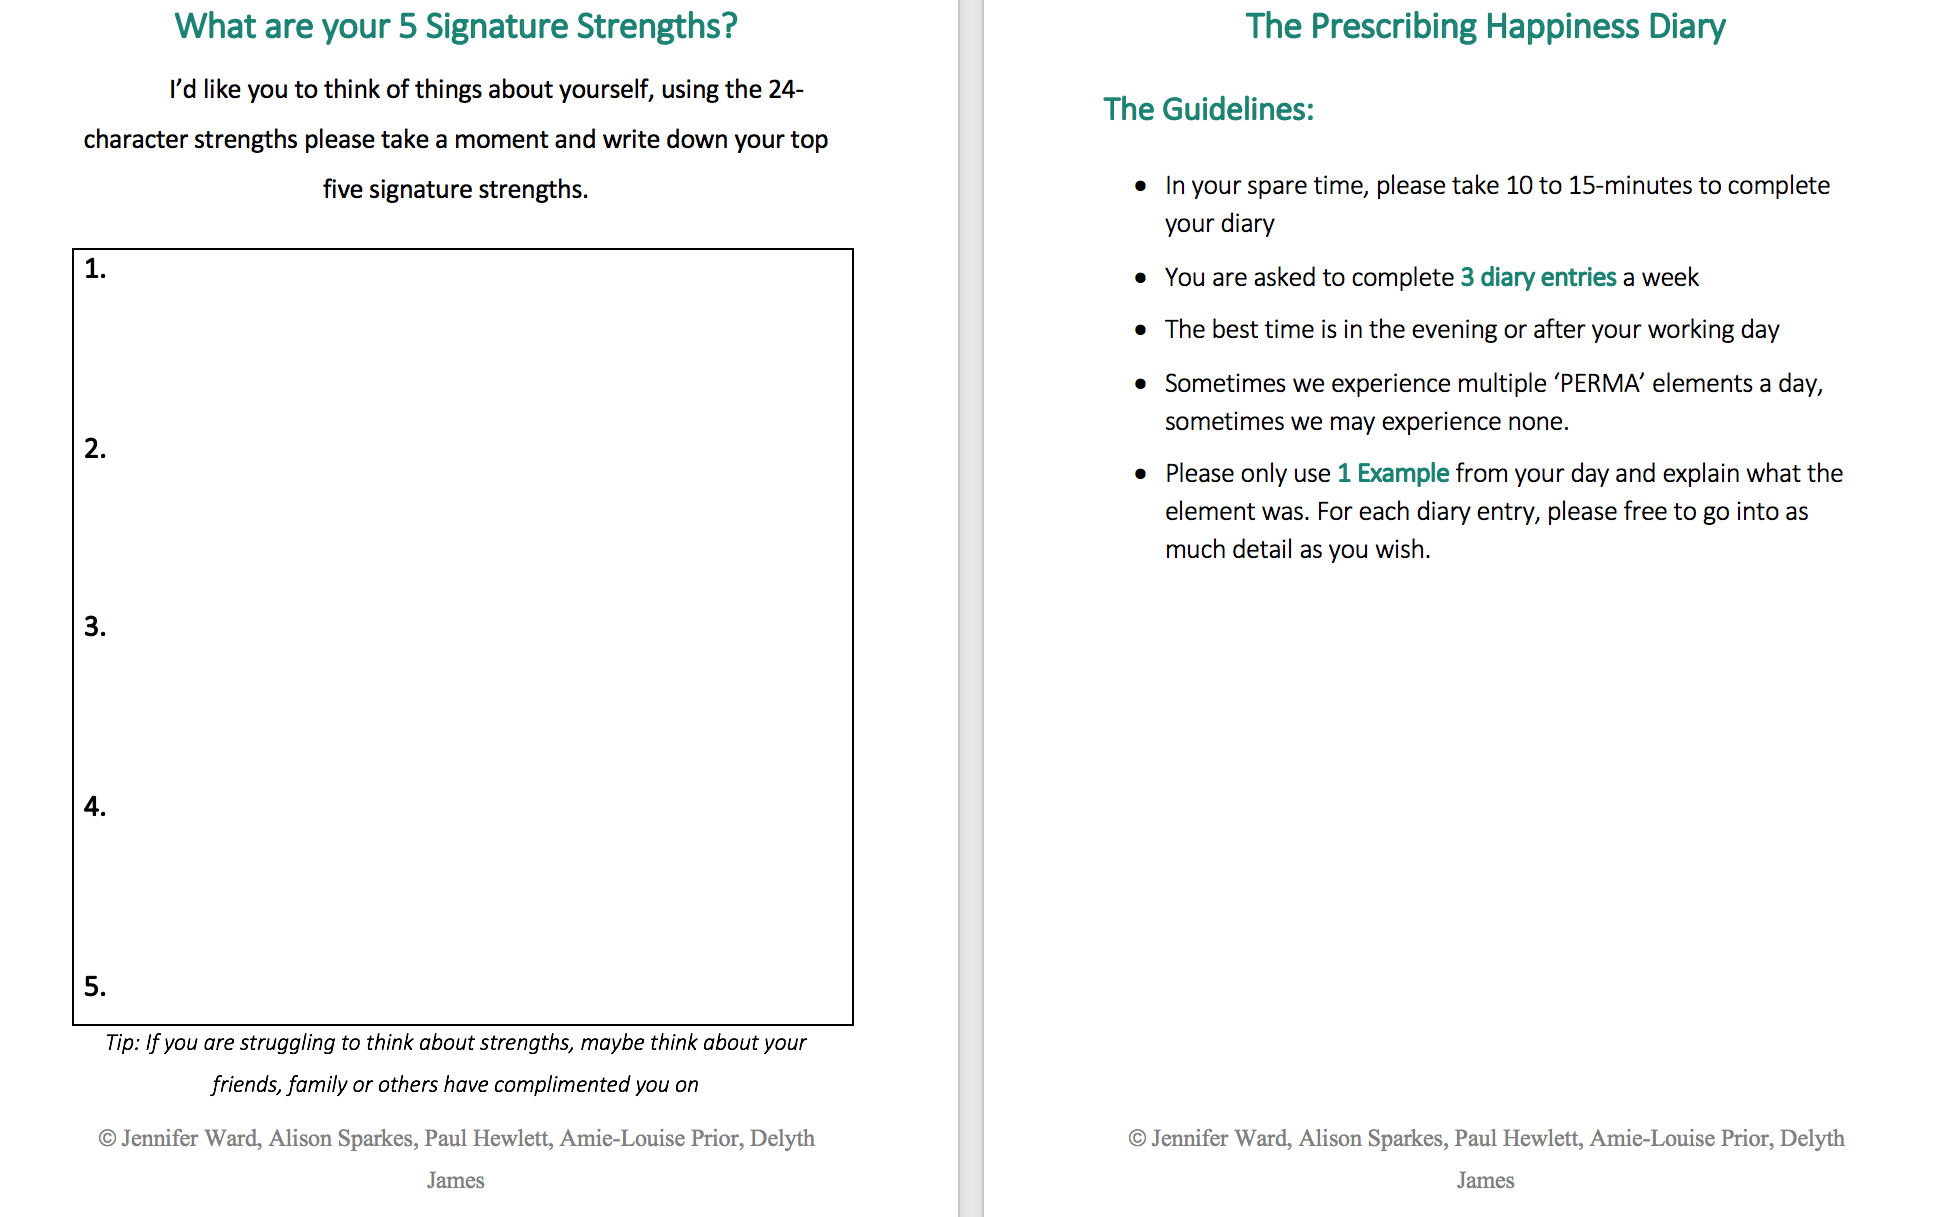


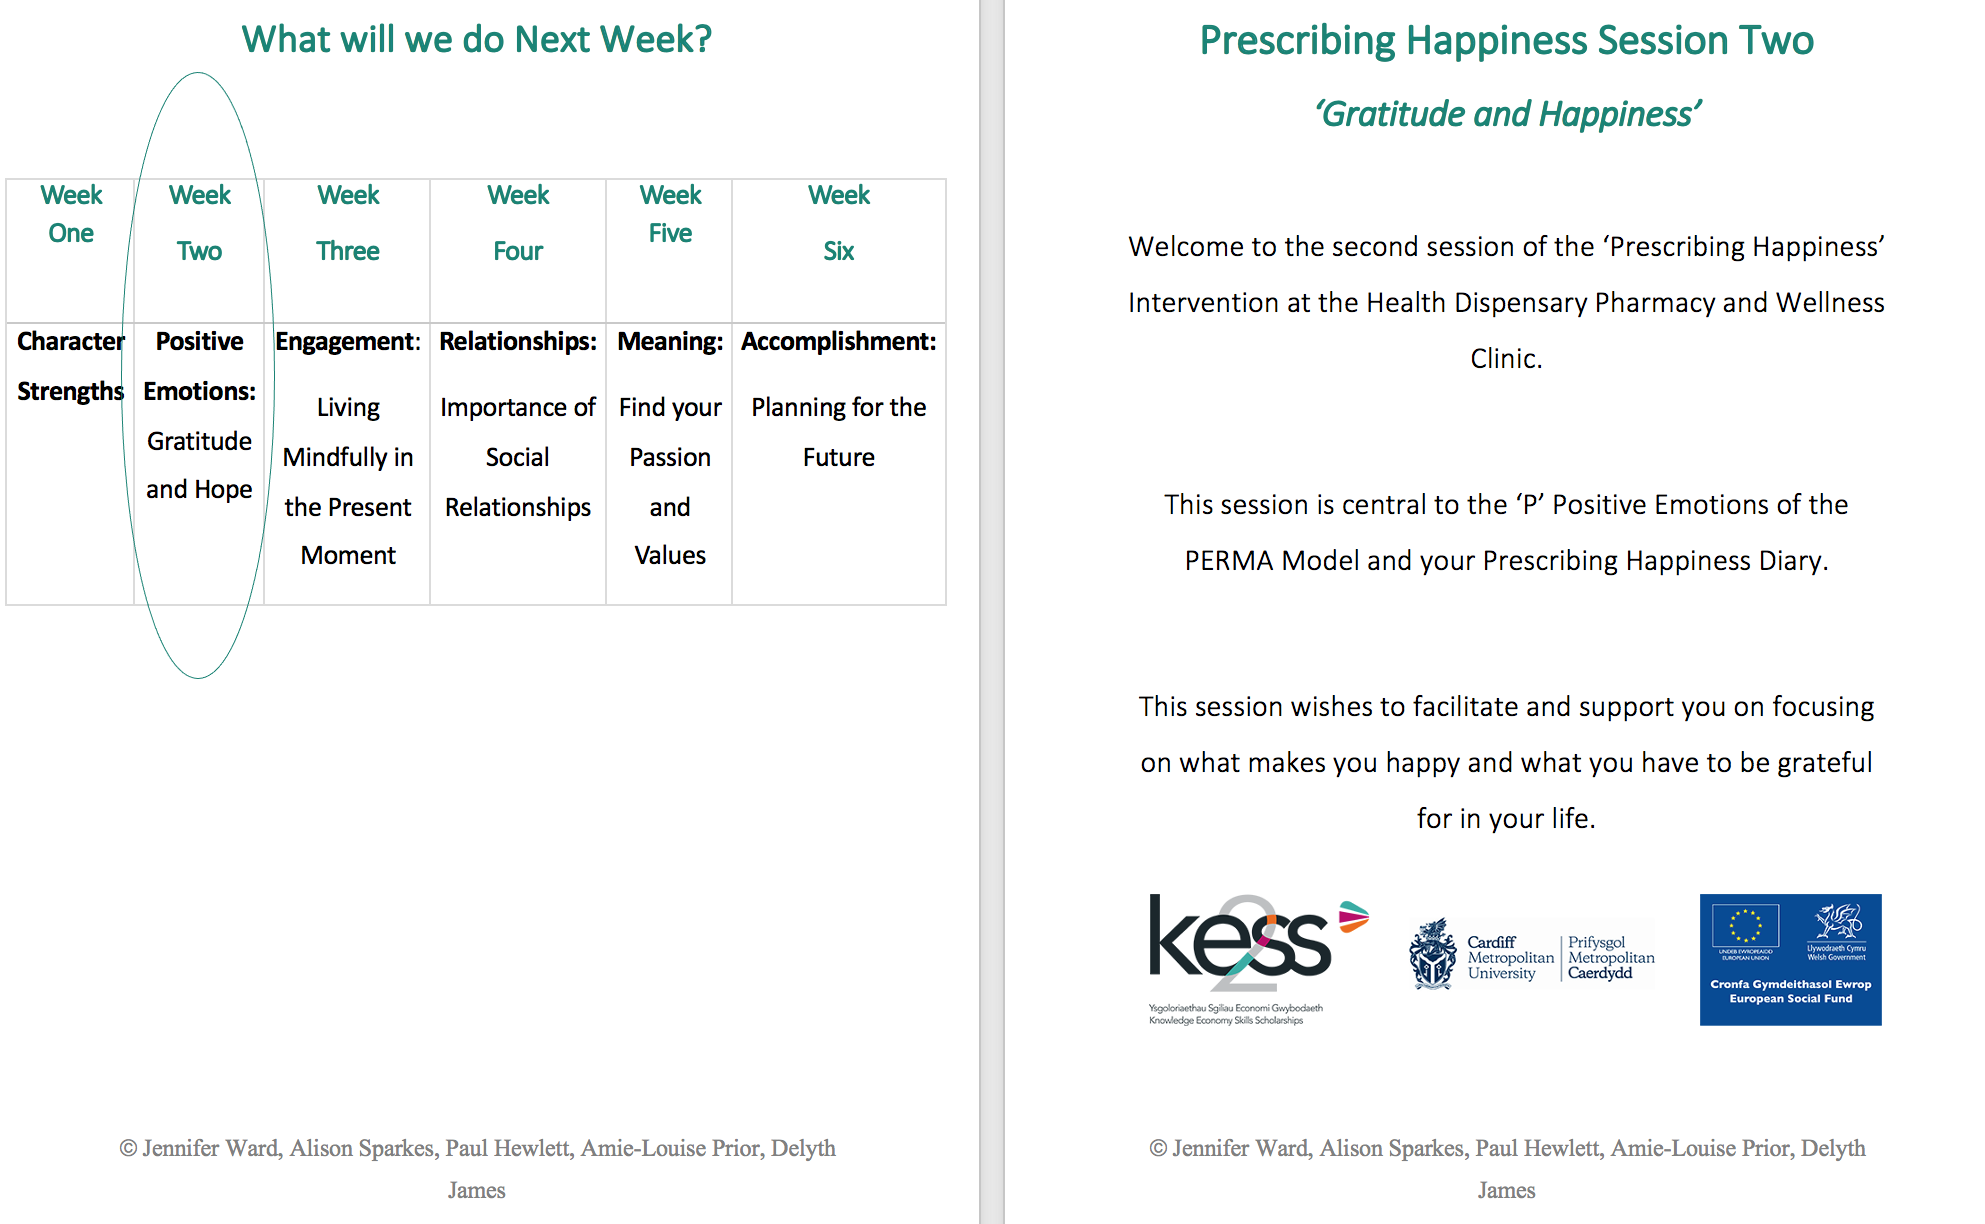


An Example from Week 1 of The *Prescribing Happiness* PERMA-based Diary


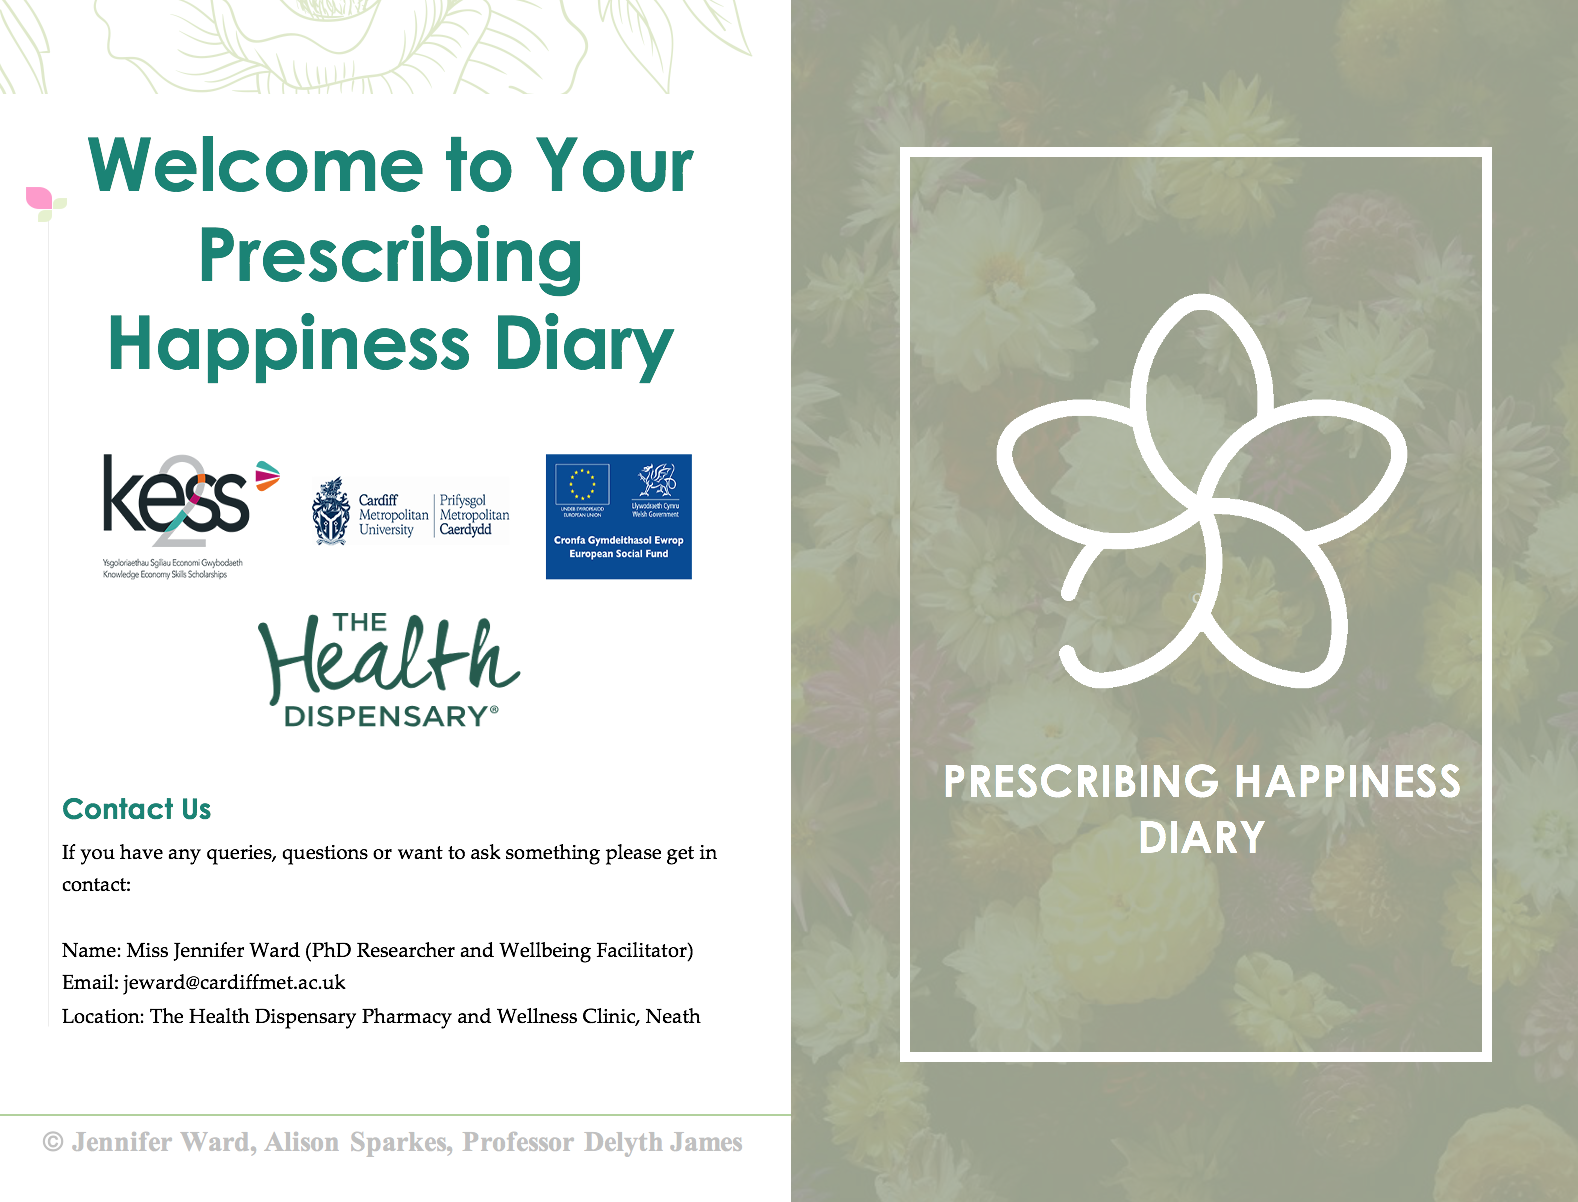


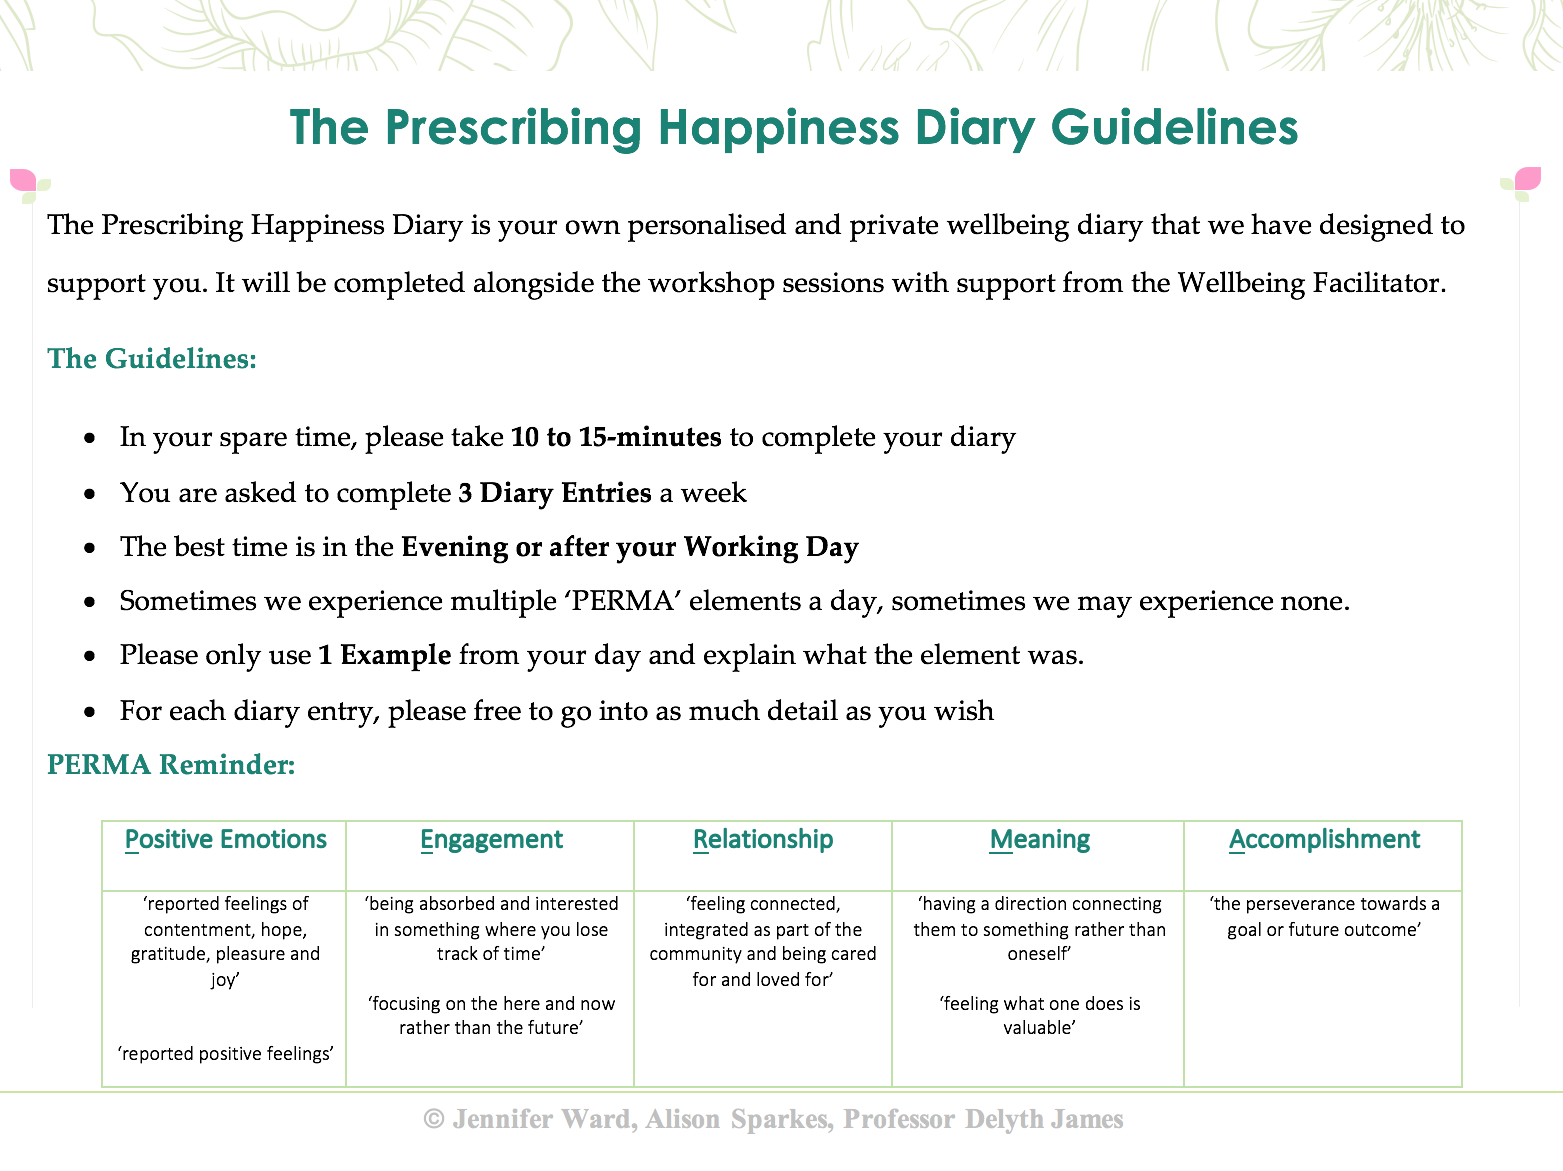


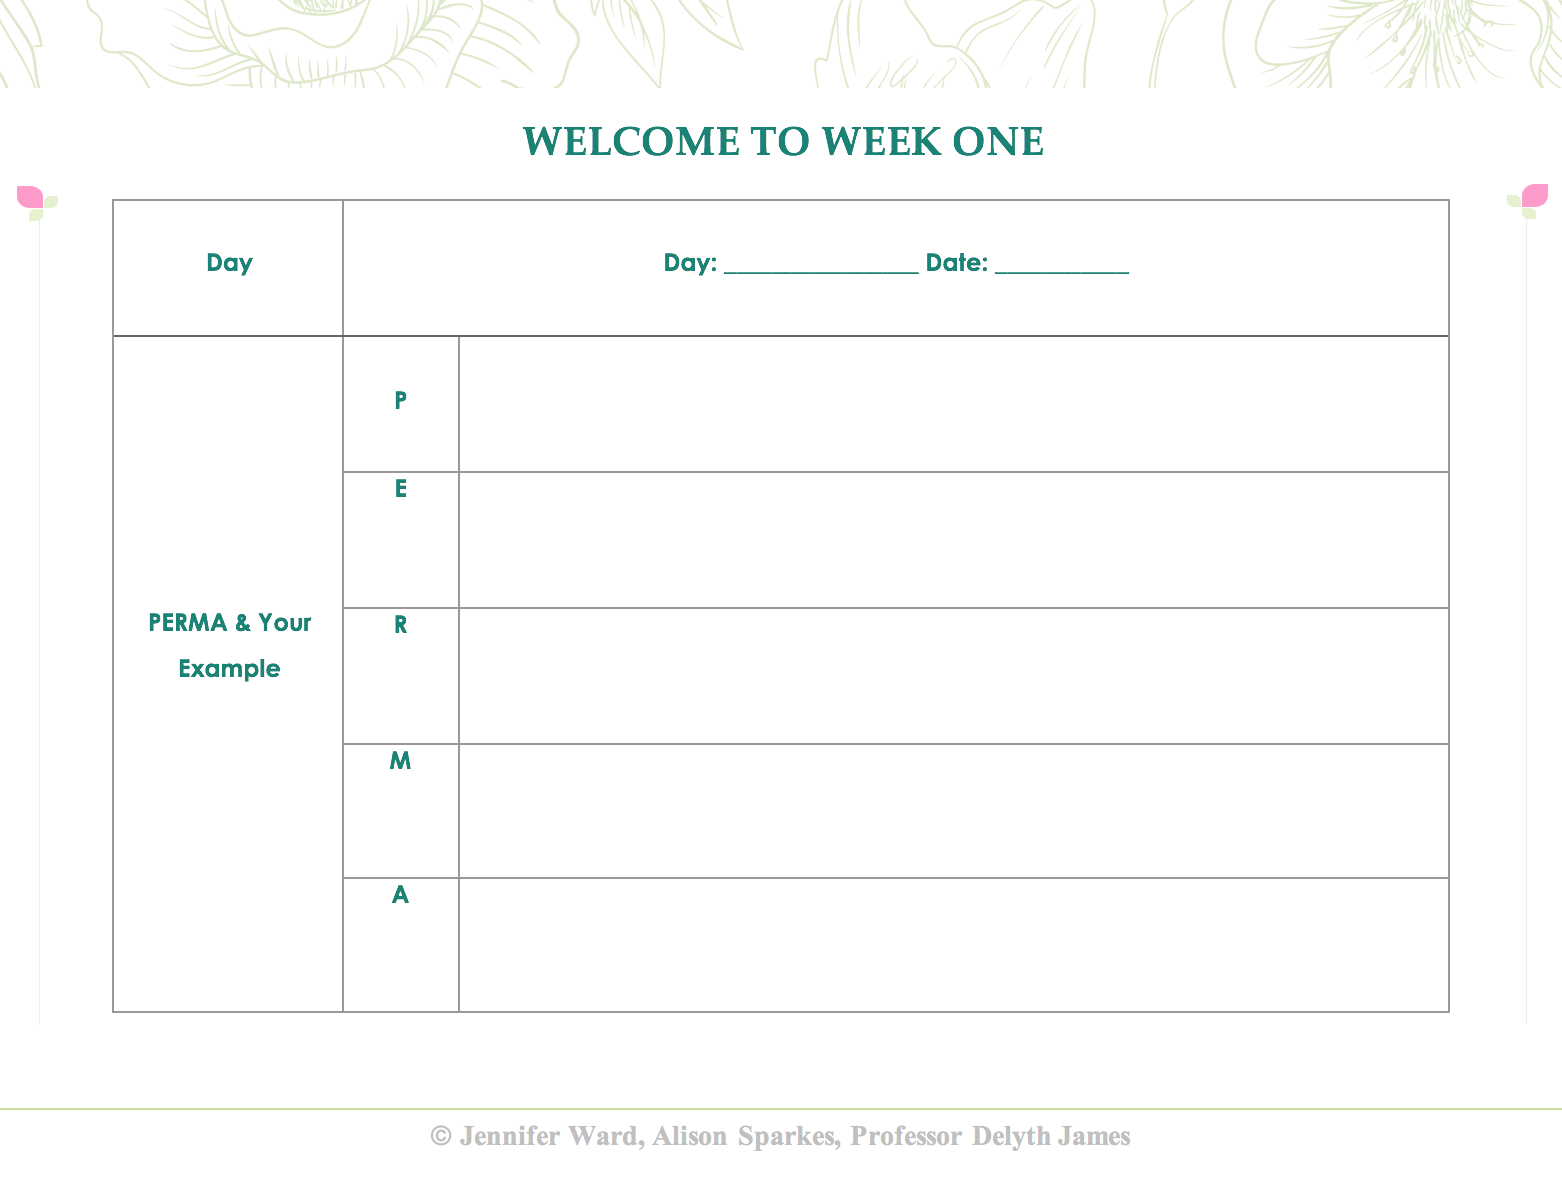


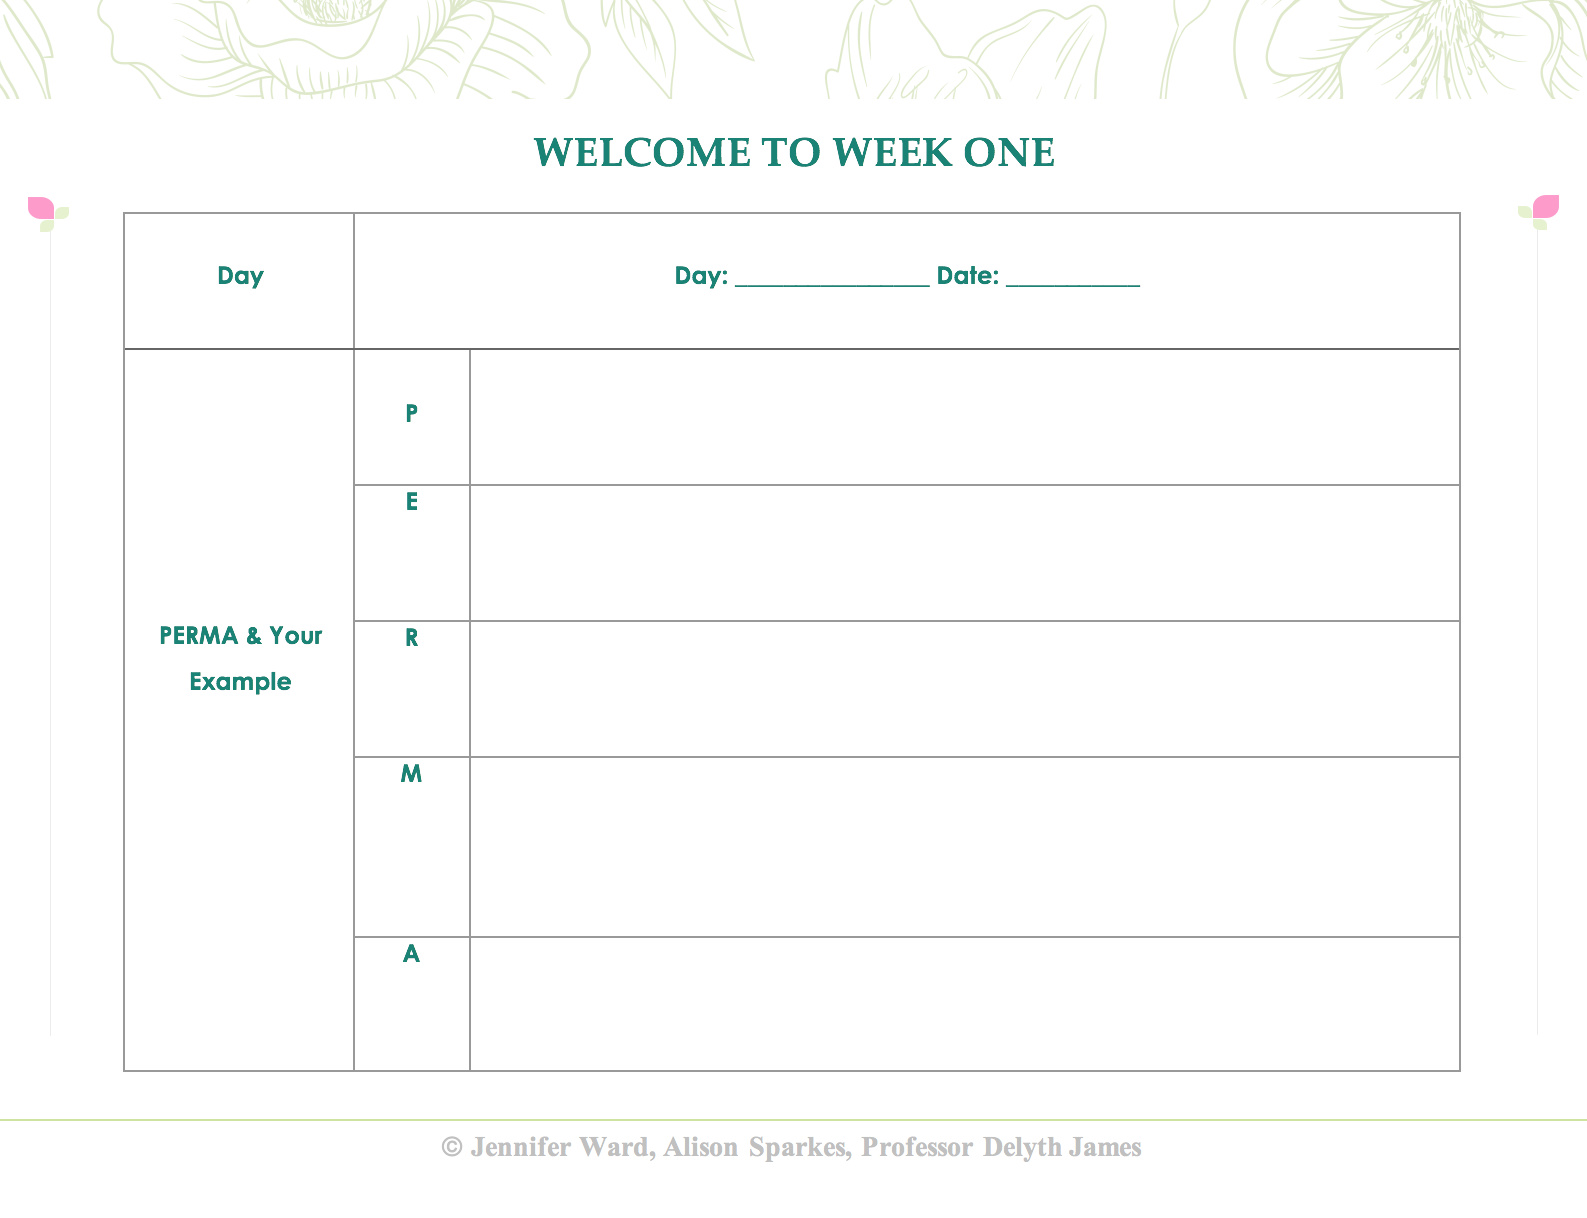


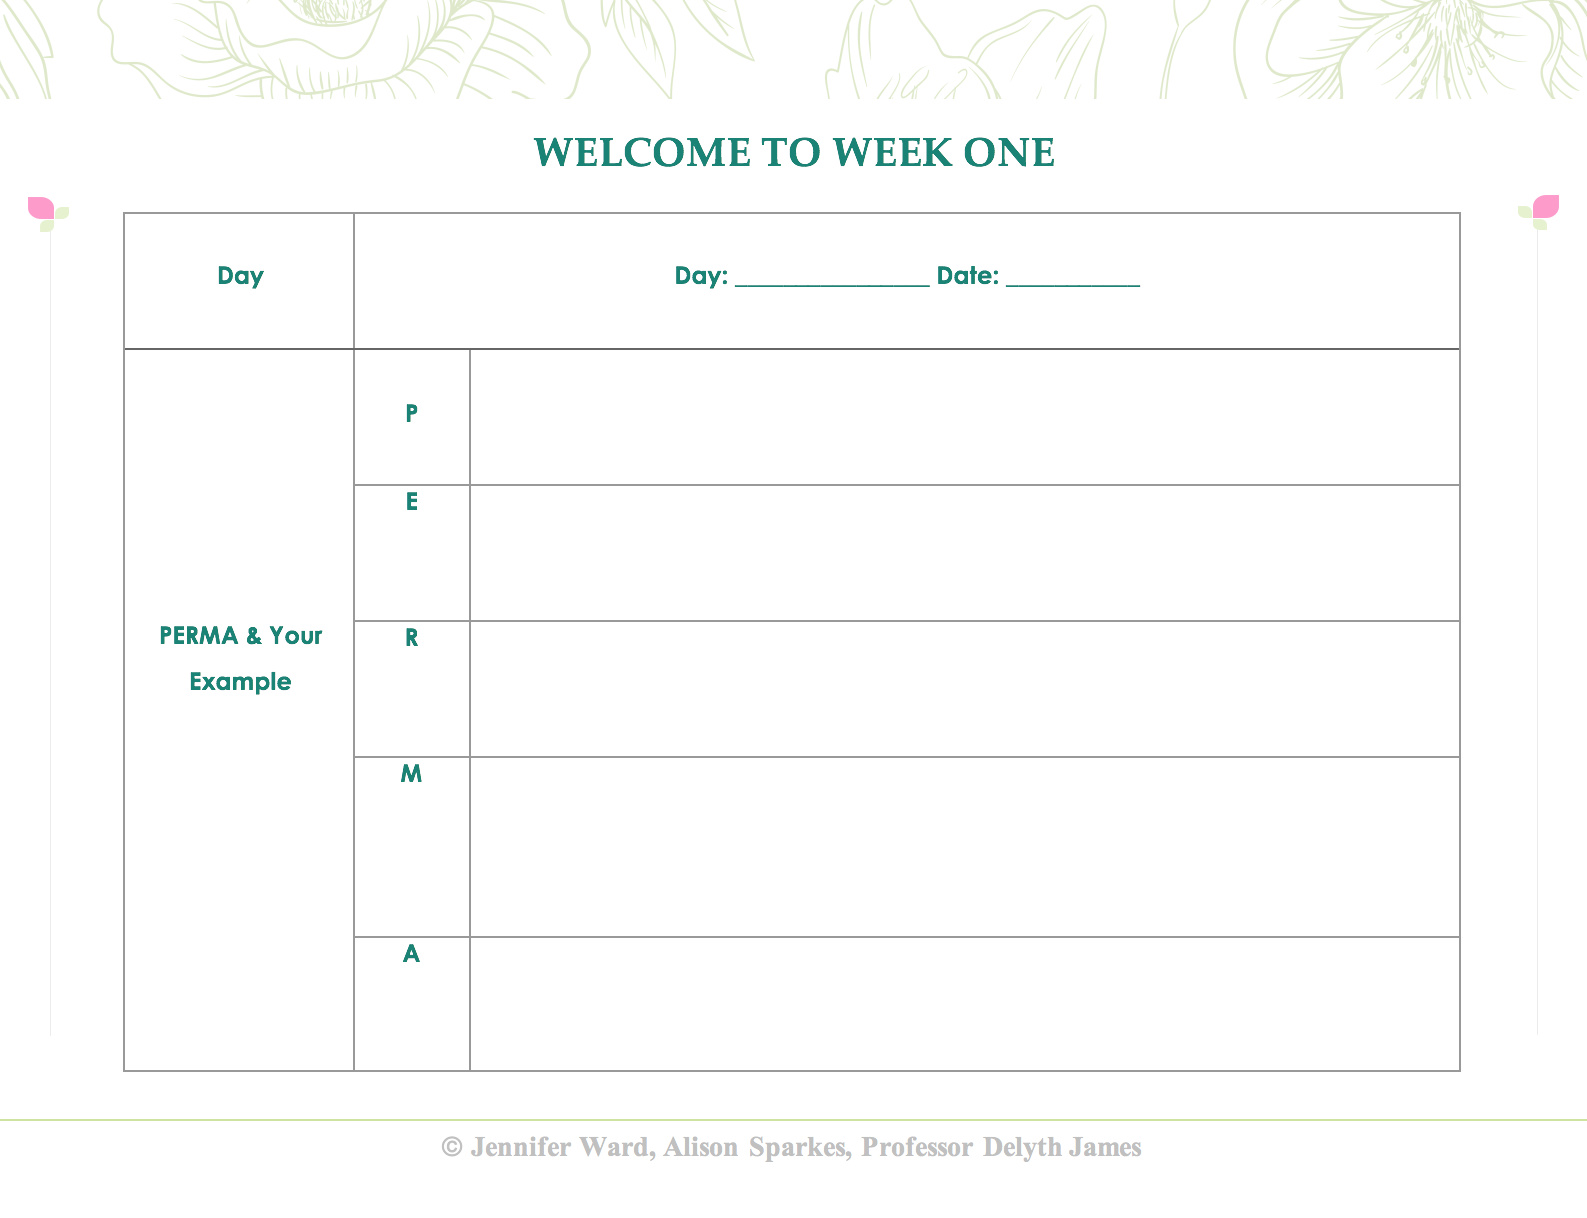


**Supplementary Material 5**

**Table 1 - TIDier Checklist**

| **TIDieR Checklist Criteria** | **Item Description** | **Result** |
| --- | --- | --- |
| **Name of Intervention** | *Provide the name or a phrase that describes the intervention* | *Prescribing Happiness (P-Hap)* |
| **Why** | *Describe any rationale, theory, or goal of the elements essential to the intervention* | To design an intervention that can be delivered in a community pharmacy setting. The aim of the PPI is to elicit positive emotions, engagement, a sense of  relationships, meaning and accomplishment (PERMA) to promote well-being in community members. |
| **What** | ***Materials:*** *Describe any physical or informational materials used in the intervention, including those provided to participants or used in intervention delivery or in training of intervention providers. Provide information on where the materials can be accessed (such as online appendix, URL)* | A total of six worksheets were developed. One worksheet to be completed in each workshop. The full  version of the intervention and the PERMA-based  diary is described. |
| ***Procedures:*** *Describe each of the procedures, activities, and/or processes used in the intervention, including any enabling or support activities* | The rationale for included intervention activities,  procedures and processes is presented in the paper. Table 3 displays and describes the main activities included in the intervention. |
| **Who**  **provided** | *For each category of intervention provider (such as psychologist, nursing assistant), describe their expertise, background, and any specific training given* | The intervention was delivered by the Well-being  Facilitator (JLW) who was also the researcher. The  researcher undertook this role as part of a PhD and has a BSc in Sport & Exercise Science, MSc in Psychology. JLW undertook additional courses in positive  psychology and motivational interviewing (MI). JLW also holds a Mental Health First Aid training  certificate. |
| **How:** | *Describe the modes of delivery (such as face to face or by some other mechanism, such as internet or telephone) of the intervention and whether it was provided individually or in a group* | One-to-one session delivered face-to-face |
| **Where** | *Describe the type(s) of location(s) where the intervention occurred, including any necessary infrastructure or relevant features* | The Health Dispensary Pharmacy (a community  pharmacy) and Wellness Clinic, Consultation Room 3 based in Neath, South Wales |
| **When and how much** | *Describe the number of times the intervention was delivered and over what period of time including the number of sessions, their schedule, and their duration, intensity, or dose* | Workshop sessions were delivered once a week for a 45-minute period for 6-weeks. Session scheduling was based on the participant’s availability and were offered Monday to Saturday ween 9:00am to 5:30pm. A PERMA-based diary was to be completed 3 days a week for 10 to 15 minutes outside the workshop  sessions for a period of 6-weeks. |
| ***Tailoring:** | *If the intervention was planned to be personalised, titrated or adapted, then describe what, why, when, and how* | Not applicable to this intervention |
| ***Modifications:** | *If the intervention was modified during the course of the study, describe the changes (what, why, when, and how)* | Described in Table 2 |
| **How well:** | *Planned: If intervention adherence or fidelity was assessed, describe how and by whom, and if any strategies were used to maintain or improve fidelity, describe them* | Not applicable in this phase of development |
| **Actual: If intervention adherence or fidelity was assessed, describe the extent to which the intervention was delivered as*  *planned* | Not applicable in the phase of development |
